# Supplementary material
Source: Springer Nature journal article supplement (https://www.springermedizin.de/resource/supplementary/12916_2014_958_MOESM7_ESM.pdf/9598914)
Supplement: MOESM7 [file 9598914]

| Study             | N Act | Mean Act | SD Act | N Plac | Mean Plac | SD Plac | RCI  | hg    | ci-   | ci+   | z     | p     | w      |
|-------------------|-------|----------|--------|--------|-----------|---------|------|-------|-------|-------|-------|-------|--------|
| vAdelsb. 2003 AII | 448   | 1.87     | 0.36   | 451    | 1.93      | 0.36    | -3.1 | -0.17 | -0.30 | -0.04 | -2.49 | 0.013 | 30.65% |
| vAdelsb. 2003AAAI | 522   | 1.72     | 0.8    | 521    | 1.85      | 0.8     | -7.0 | -0.16 | -0.28 | -0.04 | -2.62 | 0.009 | 35.57% |
| Philip 2002       | 348   | 1.52     | 0.425  | 352    | 1.67      | 0.425   | -8.7 | -0.35 | -0.50 | -0.20 | -4.63 | 0.000 | 23.58% |
| Nayak 2002        | 155   | 1.58     | 0.435  | 149    | 1.75      | 0.435   | -9.7 | -0.39 | -0.62 | -0.16 | -3.37 | 0.001 | 10.20% |
| TOTAL N           | 2946  |          |        |        |           |         |      | -0.23 | -0.30 | -0.16 | -6.26 | 0.000 | Fixed  |
|                   |       |          |        |        |           |         |      | -0.25 | -0.36 | -0.14 | -4.37 | 0.000 | Random |

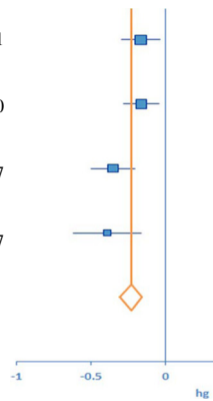

|                   |        |
|-------------------|--------|
| Q                 | 6.581  |
| p                 | 0.087  |
| I <sup>2</sup>    | 54.41% |
| weighted mean RCI | -6.5   |
